# Supplementary material for: Evaluating the Efficiency of the Cobas 6800 System for BK Virus Detection in Plasma and Urine Samples
Source: MDPI journal article supplement (doi:10.3390/diagnostics13172860), 2023-09-04
Supplement: s1 [file s1]

**Supplementary Table S1.** Clinical characteristics of the patient with discordant plasma viral loads

| PID  | Plasma viral loads (IU/mL) |            | Sex | Age | Diagnosis                       | Basis for BKV test                                                                                                                                  | Trends in BK viral loads in plasma  |
|------|----------------------------|------------|-----|-----|---------------------------------|-----------------------------------------------------------------------------------------------------------------------------------------------------|-------------------------------------|
|      | Real-Q                     | Cobas 6800 |     |     |                                 |                                                                                                                                                     |                                     |
| P-45 | 10,725,000                 |            | M   | 35  | Z94.0: Kidney transplant status | The patient received a kidney transplant on July 22, 2018, owing to end-stage renal disease that progressed from focal segmental glomerulosclerosis | Dec 13, 2022: 14,300 copies/mL      |
|      |                            |            |     |     |                                 |                                                                                                                                                     | Nov 15, 2022: 7,220 copies/mL       |
|      | (27,500,000                | 707        |     |     |                                 |                                                                                                                                                     | Aug 16, 2022*: 27,500,000 copies/mL |
|      | copies/mL)                 |            |     |     |                                 |                                                                                                                                                     | Jul 29, 2021: <4,500 copies/mL      |
|      |                            |            |     |     |                                 |                                                                                                                                                     | Mar 26, 2021: <4,500 copies/mL      |

\*The plasma sample for comparison between the assays was collected on August 16, 2022.

Abbreviations: BKV, BK virus; IU, international unit; PID, patient identification.
